# Supplementary material
Source: Springer Nature journal article supplement (https://www.springermedizin.de/resource/supplementary/13024_2012_341_MOESM2_ESM.pdf/9643780)
Supplement: MOESM2 [file 9643780]

# Run Overview Report

**Project:** PGX160511Yulia  
**Assay:** Eukaryote Total RNA StdSens  
**Run:** Run\_Eukaryote\_TotalRNA\_StdSens\_001398\_5-16-2011\_9-12-22 AM  
**Run Version:** N/A

**Acq. Analyst:** DefaultUser  
**Acq. Time:** 5/16/2011 9:12:23 AM  
**Signature:** N/A

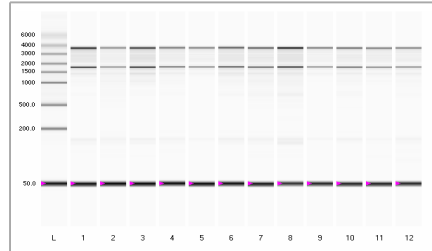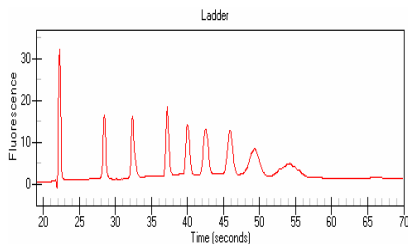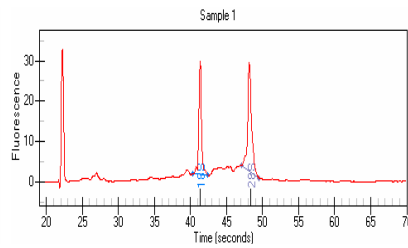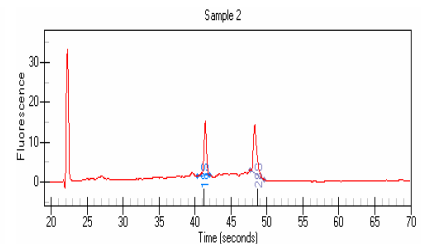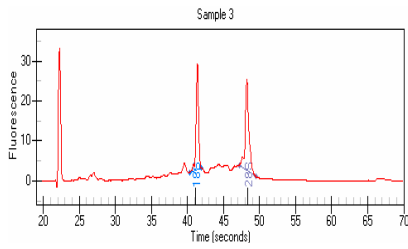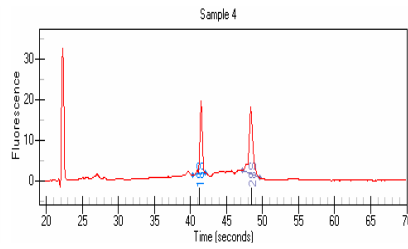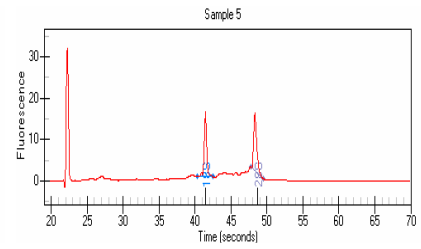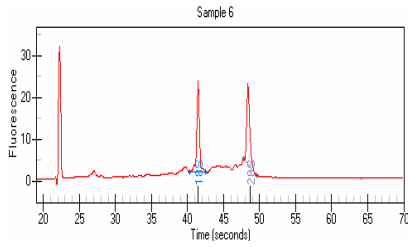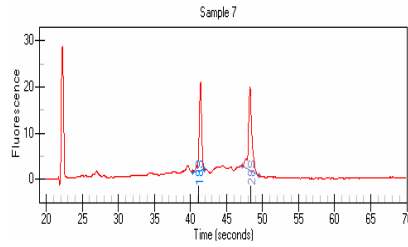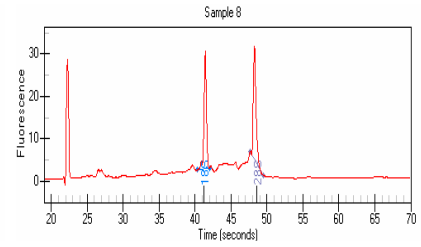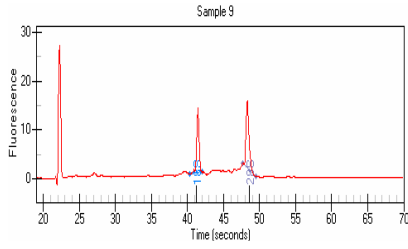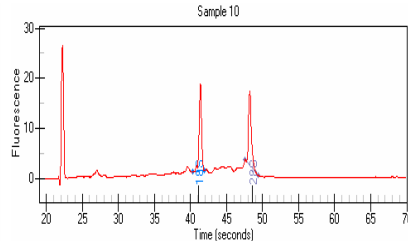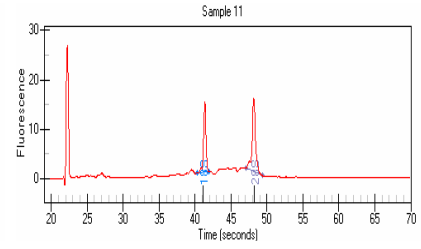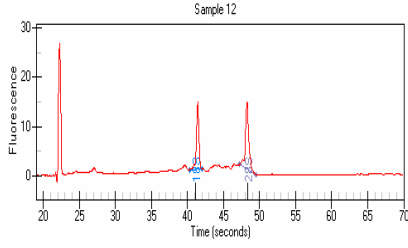

# Virtual Gel Report

**Project:** PGX160511Yulia  
**Assay:** Eukaryote Total RNA StdSens  
**Run:** Run\_Eukaryote\_TotalRNA\_StdSens\_001398\_5-16-2011\_9-12-22 AM  
**Run Version:** N/A

**Acq. Analyst:** DefaultUser  
**Acq. Time:** 5/16/2011 9:12:23 AM  
**Signature:** N/A

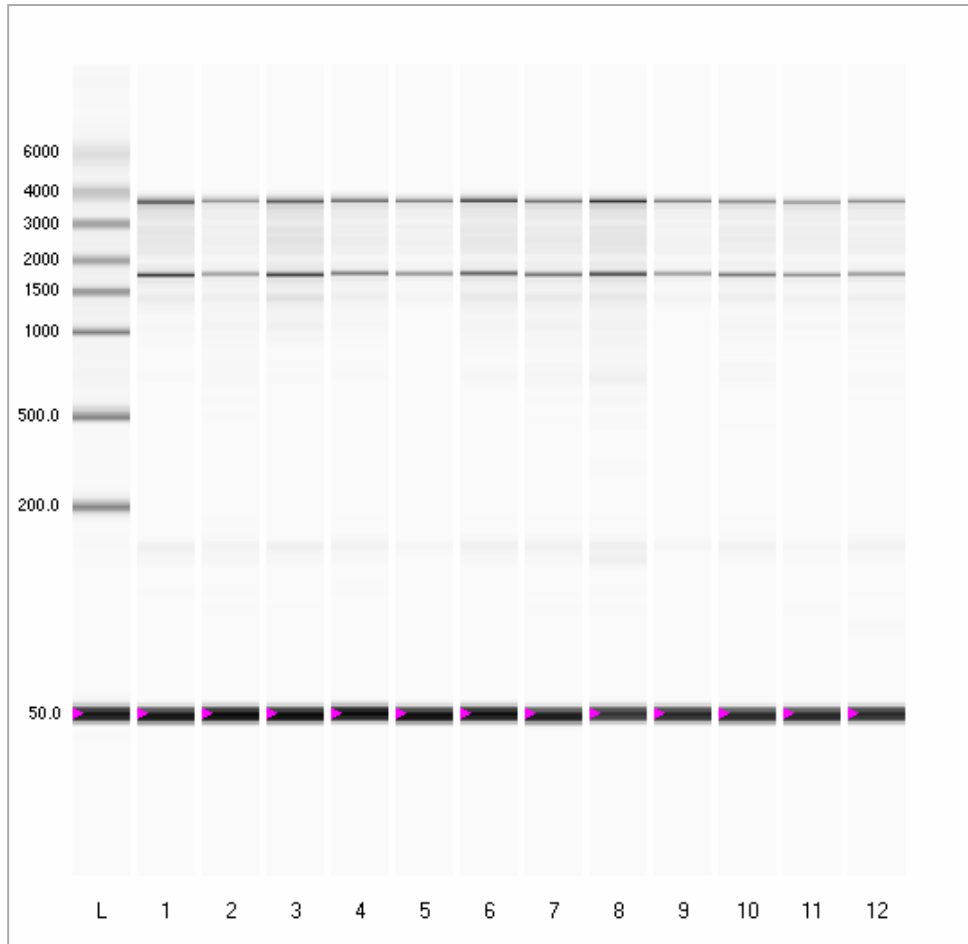

# Egram, Gel Lane and Result Table Report

**Project:** PGX160511Yulia  
**Assay:** Eukaryote Total RNA StdSens  
**Run:** Run\_Eukaryote\_TotalRNA\_StdSens\_001398\_5-16-2011\_9-12-22 AM  
**Run Version:** N/A

**Acq. Analyst:** DefaultUser  
**Acq. Time:** 5/16/2011 9:12:23 AM  
**Signature:** N/A

**Well# Ladder**

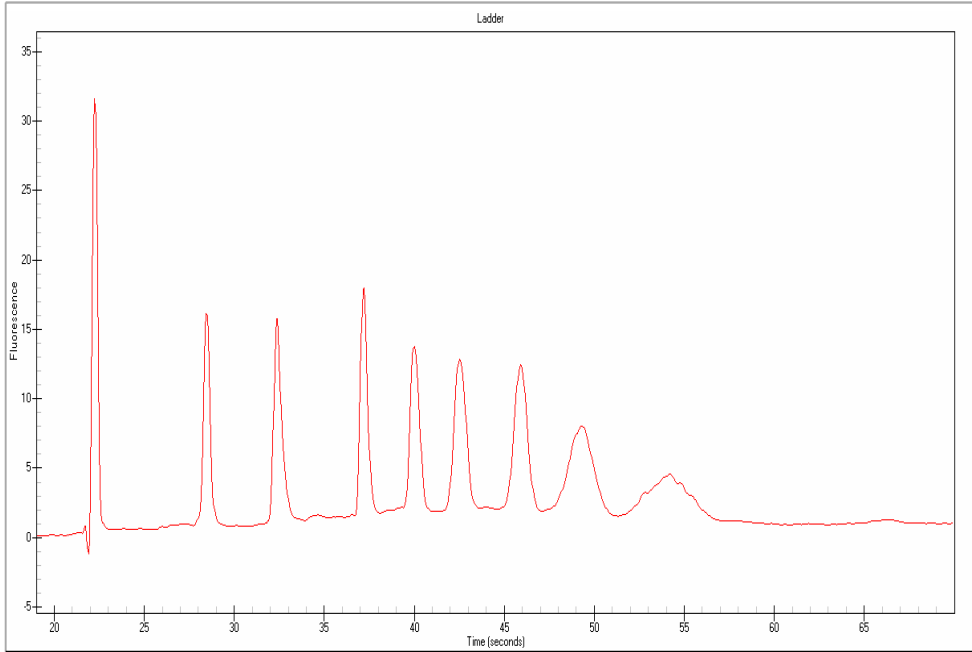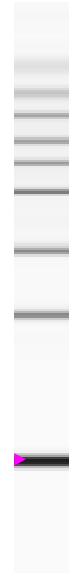

L

**Well# Ladder**

RNA Area: 242.68  
 RNA Concentration: 160.00 ng/μl

**Well# Ladder**

| Peak State | Peak Number | Mig. Time (secs) | Corrected Area | Comments |
|------------|-------------|------------------|----------------|----------|
|            | 1           | 21.75            | 0.38           |          |
|            | 2           | 22.25            | 47.70          |          |
| L          | 3           | 28.45            | 22.91          |          |
| L          | 4           | 32.40            | 23.15          |          |
| L          | 5           | 37.20            | 21.62          |          |
|            | 6           | 39.30            | 0.96           |          |
| L          | 7           | 40.00            | 19.98          |          |
| L          | 8           | 42.50            | 23.19          |          |
|            | 9           | 43.95            | 1.59           |          |
| L          | 10          | 45.90            | 22.96          |          |

# Egram, Gel Lane and Result Table Report

**Project:** PGX160511Yulia  
**Assay:** Eukaryote Total RNA StdSens  
**Run:** Run\_Eukaryote\_TotalRNA\_StdSens\_001398\_5-16-2011\_9-12-22 AM  
**Run Version:** N/A

**Acq. Analyst:** DefaultUser  
**Acq. Time:** 5/16/2011 9:12:23 AM  
**Signature:** N/A

| Well# Ladder                                                                      |             |                  |                |          |
|-----------------------------------------------------------------------------------|-------------|------------------|----------------|----------|
| Peak State                                                                        | Peak Number | Mig. Time (secs) | Corrected Area | Comments |
| L                                                                                 | 11          | 49.35            | 23.96          |          |
|                                                                                   | 12          | 52.80            | 3.04           |          |
|  | 13          | 54.20            | 13.80          |          |

# Egram, Gel Lane and Result Table Report

**Project:** PGX160511Yulia  
**Assay:** Eukaryote Total RNA StdSens  
**Run:** Run\_Eukaryote\_TotalRNA\_StdSens\_001398\_5-16-2011\_9-12-22 AM  
**Run Version:** N/A

**Acq. Analyst:** DefaultUser  
**Acq. Time:** 5/16/2011 9:12:23 AM  
**Signature:** N/A

**Well# 1 Sample 1**

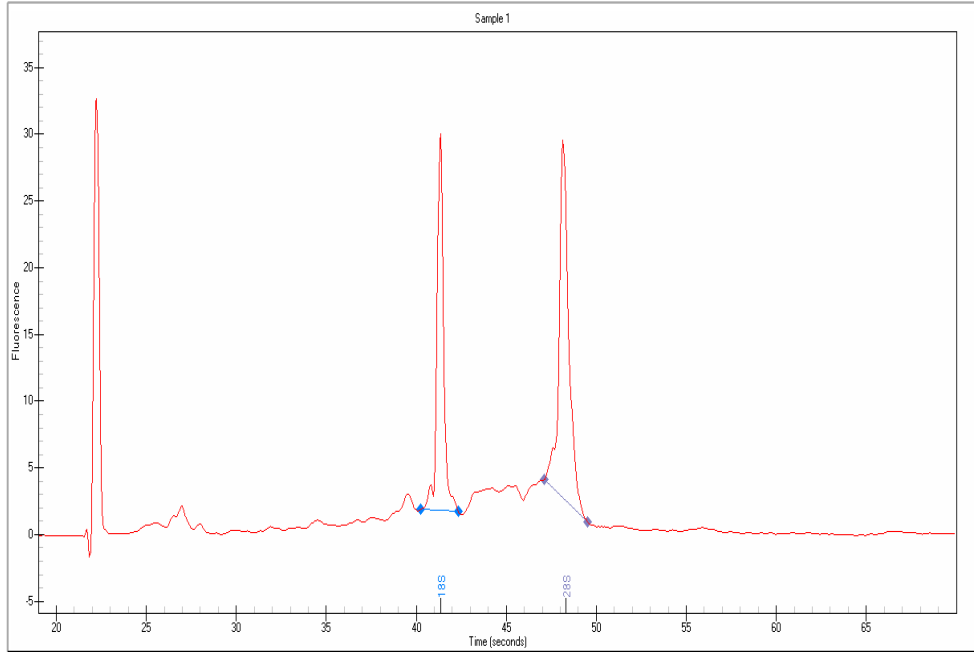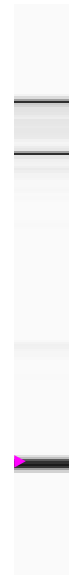

**Well# 1 Sample 1**

| Fragment Number | Fragment Name | Start Time | End Time | Area  | % of Total Area |
|-----------------|---------------|------------|----------|-------|-----------------|
| 1               | 18S           | 40.30      | 42.40    | 29.20 | 17.38           |
| 2               | 28S           | 47.10      | 49.50    | 35.09 | 20.89           |

RNA Area: 167.97  
 RNA Concentration: 110.75 ng/μl  
 Ratio[28S/18S]: 1.20  
 RQI: 9.3 ■

**Well# 1 Sample 1**

| Peak State | Peak Number | Mig. Time (secs) | Corrected Area | Comments |
|------------|-------------|------------------|----------------|----------|
|            | 1           | 22.25            | 49.60          |          |
|            | 2           | 26.97            | 2.74           |          |
|            | 3           | 27.96            | 0.82           |          |
|            | 4           | 39.53            | 2.00           |          |
|            | 5           | 40.78            | 0.99           |          |
|            | 6           | 41.32            | 25.58          |          |
|            | 7           | 47.58            | 4.10           |          |

# Egram, Gel Lane and Result Table Report

**Project:** PGX160511Yulia  
**Assay:** Eukaryote Total RNA StdSens  
**Run:** Run\_Eukaryote\_TotalRNA\_StdSens\_001398\_5-16-2011\_9-12-22 AM  
**Run Version:** N/A

**Acq. Analyst:** DefaultUser  
**Acq. Time:** 5/16/2011 9:12:23 AM  
**Signature:** N/A

## Well# 1 Sample 1

| Peak State | Peak Number | Mig. Time (secs) | Corrected Area | Comments |
|------------|-------------|------------------|----------------|----------|
|            | 8           | 48.18            | 36.72          |          |

# Egram, Gel Lane and Result Table Report

**Project:** PGX160511Yulia  
**Assay:** Eukaryote Total RNA StdSens  
**Run:** Run\_Eukaryote\_TotalRNA\_StdSens\_001398\_5-16-2011\_9-12-22 AM  
**Run Version:** N/A

**Acq. Analyst:** DefaultUser  
**Acq. Time:** 5/16/2011 9:12:23 AM  
**Signature:** N/A

**Well# 2 Sample 2**

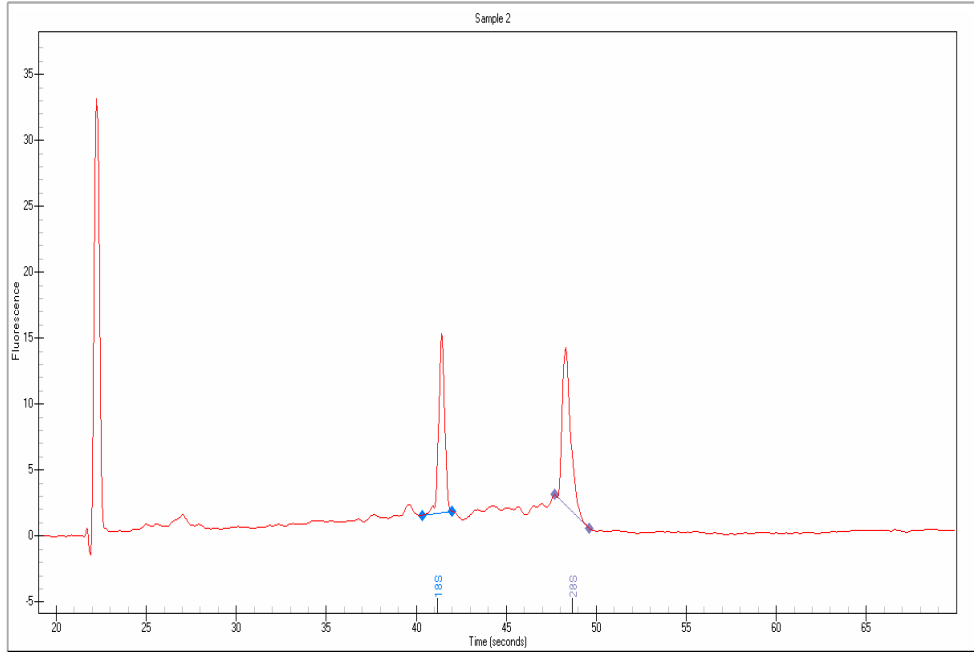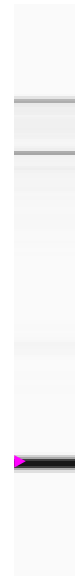

2

**Well# 2 Sample 2**

| Fragment Number | Fragment Name | Start Time | End Time | Area  | % of Total Area |
|-----------------|---------------|------------|----------|-------|-----------------|
| 1               | 18S           | 40.35      | 42.00    | 12.73 | 11.91           |
| 2               | 28S           | 47.70      | 49.60    | 13.36 | 12.49           |

RNA Area: 106.92  
 RNA Concentration: 70.49 ng/μl  
 Ratio[28S/18S]: 1.05  
 RQI: 8.0 ■

**Well# 2 Sample 2**

| Peak State | Peak Number | Mig. Time (secs) | Corrected Area | Comments |
|------------|-------------|------------------|----------------|----------|
|            | 1           | 22.25            | 49.14          |          |
|            | 2           | 27.06            | 1.11           |          |
|            | 3           | 39.59            | 0.90           |          |
|            | 4           | 40.88            | 0.36           |          |
|            | 5           | 41.43            | 12.37          |          |
|            | 6           | 46.98            | 0.82           |          |
|            | 7           | 47.67            | 1.61           |          |

# Egram, Gel Lane and Result Table Report

**Project:** PGX160511Yulia  
**Assay:** Eukaryote Total RNA StdSens  
**Run:** Run\_Eukaryote\_TotalRNA\_StdSens\_001398\_5-16-2011\_9-12-22 AM  
**Run Version:** N/A

**Acq. Analyst:** DefaultUser  
**Acq. Time:** 5/16/2011 9:12:23 AM  
**Signature:** N/A

| Well# 2 Sample 2 |             |                  |                |          |
|------------------|-------------|------------------|----------------|----------|
| Peak State       | Peak Number | Mig. Time (secs) | Corrected Area | Comments |
|                  | 8           | 48.32            | 16.96          |          |



# Egram, Gel Lane and Result Table Report

**Project:** PGX160511Yulia  
**Assay:** Eukaryote Total RNA StdSens  
**Run:** Run\_Eukaryote\_TotalRNA\_StdSens\_001398\_5-16-2011\_9-12-22 AM  
**Run Version:** N/A

**Acq. Analyst:** DefaultUser  
**Acq. Time:** 5/16/2011 9:12:23 AM  
**Signature:** N/A

**Well# 3 Sample 3**

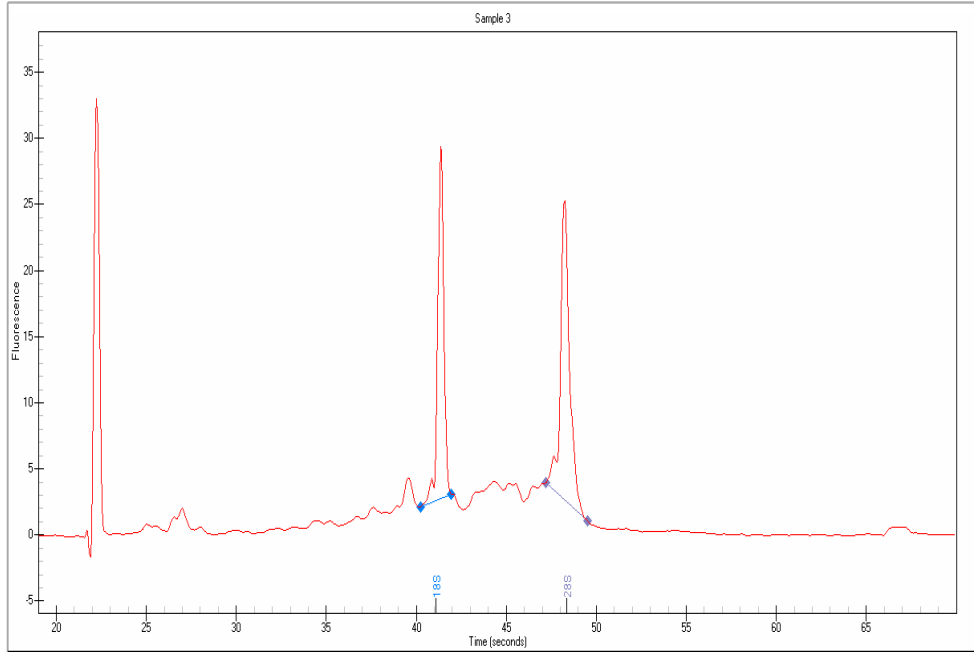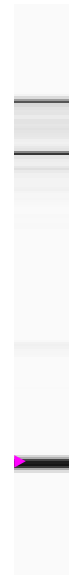

3

**Well# 3 Sample 3**

| Fragment Number | Fragment Name | Start Time | End Time | Area  | % of Total Area |
|-----------------|---------------|------------|----------|-------|-----------------|
| 1               | 18S           | 40.25      | 41.95    | 25.46 | 15.40           |
| 2               | 28S           | 47.20      | 49.50    | 27.63 | 16.71           |

RNA Area: 165.38  
 RNA Concentration: 109.04 ng/μl  
 Ratio[28S/18S]: 1.09

RQI: 9.1 ■

**Well# 3 Sample 3**

| Peak State | Peak Number | Mig. Time (secs) | Corrected Area | Comments |
|------------|-------------|------------------|----------------|----------|
|            | 1           | 22.25            | 49.20          |          |
|            | 2           | 25.06            | 0.91           |          |
|            | 3           | 26.99            | 2.43           |          |
|            | 4           | 37.59            | 0.64           |          |
|            | 5           | 39.57            | 4.09           |          |
|            | 6           | 40.85            | 2.78           |          |
|            | 7           | 41.39            | 29.24          |          |

# Egram, Gel Lane and Result Table Report

**Project:** PGX160511Yulia  
**Assay:** Eukaryote Total RNA StdSens  
**Run:** Run\_Eukaryote\_TotalRNA\_StdSens\_001398\_5-16-2011\_9-12-22 AM  
**Run Version:** N/A

**Acq. Analyst:** DefaultUser  
**Acq. Time:** 5/16/2011 9:12:23 AM  
**Signature:** N/A

| Well# 3 Sample 3 |             |                  |                |          |
|------------------|-------------|------------------|----------------|----------|
| Peak State       | Peak Number | Mig. Time (secs) | Corrected Area | Comments |
|                  | 8           | 44.35            | 6.03           |          |
|                  | 9           | 47.66            | 4.93           |          |
|                  | 10          | 48.25            | 30.52          |          |

# Egram, Gel Lane and Result Table Report

**Project:** PGX160511Yulia  
**Assay:** Eukaryote Total RNA StdSens  
**Run:** Run\_Eukaryote\_TotalRNA\_StdSens\_001398\_5-16-2011\_9-12-22 AM  
**Run Version:** N/A

**Acq. Analyst:** DefaultUser  
**Acq. Time:** 5/16/2011 9:12:23 AM  
**Signature:** N/A

**Well# 4 Sample 4**

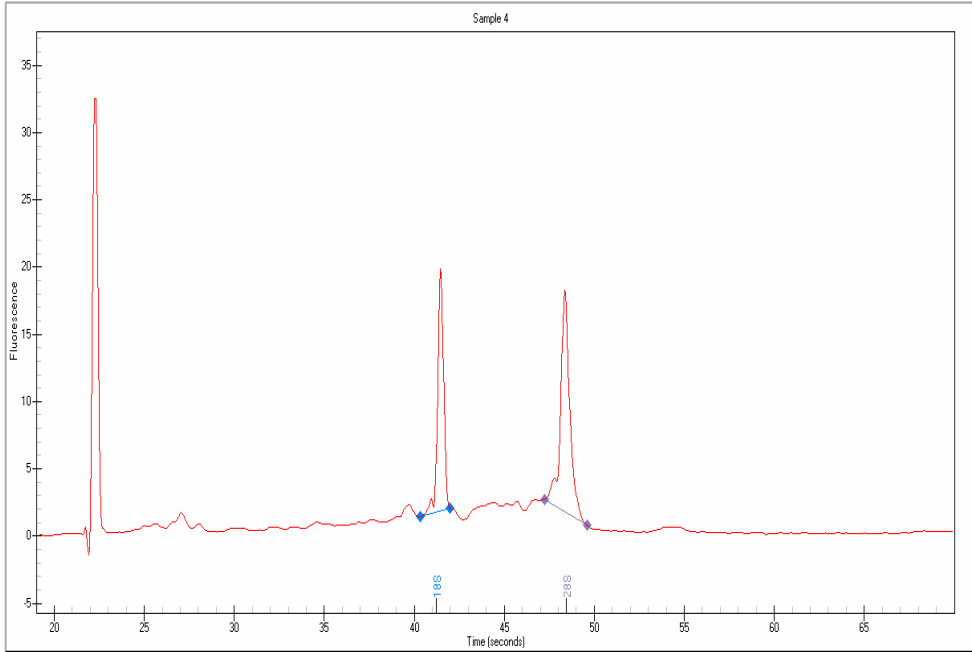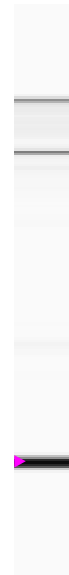

4

**Well# 4 Sample 4**

| Fragment Number | Fragment Name | Start Time | End Time | Area  | % of Total Area |
|-----------------|---------------|------------|----------|-------|-----------------|
| 1               | 18S           | 40.40      | 42.05    | 16.96 | 15.35           |
| 2               | 28S           | 47.30      | 49.60    | 20.16 | 18.25           |

RNA Area: 110.45  
 RNA Concentration: 72.82 ng/μl  
 Ratio[28S/18S]: 1.19  
 RQI: 8.7 ■

**Well# 4 Sample 4**

| Peak State | Peak Number | Mig. Time (secs) | Corrected Area | Comments |
|------------|-------------|------------------|----------------|----------|
|            | 1           | 22.25            | 48.49          |          |
|            | 2           | 27.07            | 1.88           |          |
|            | 3           | 39.68            | 1.47           |          |
|            | 4           | 40.96            | 0.84           |          |
|            | 5           | 41.45            | 16.42          |          |
|            | 6           | 47.80            | 1.48           |          |
|            | 7           | 48.34            | 19.13          |          |

Egram, Gel Lane and Result Table Report

**Project:** PGX160511Yulia  
**Assay:** Eukaryote Total RNA StdSens  
**Run:** Run\_Eukaryote\_TotalRNA\_StdSens\_001398\_5-16-2011\_9-12-22 AM  
**Run Version:** N/A

**Acq. Analyst:** DefaultUser  
**Acq. Time:** 5/16/2011 9:12:23 AM  
**Signature:** N/A

**Well# 5 Sample 5**

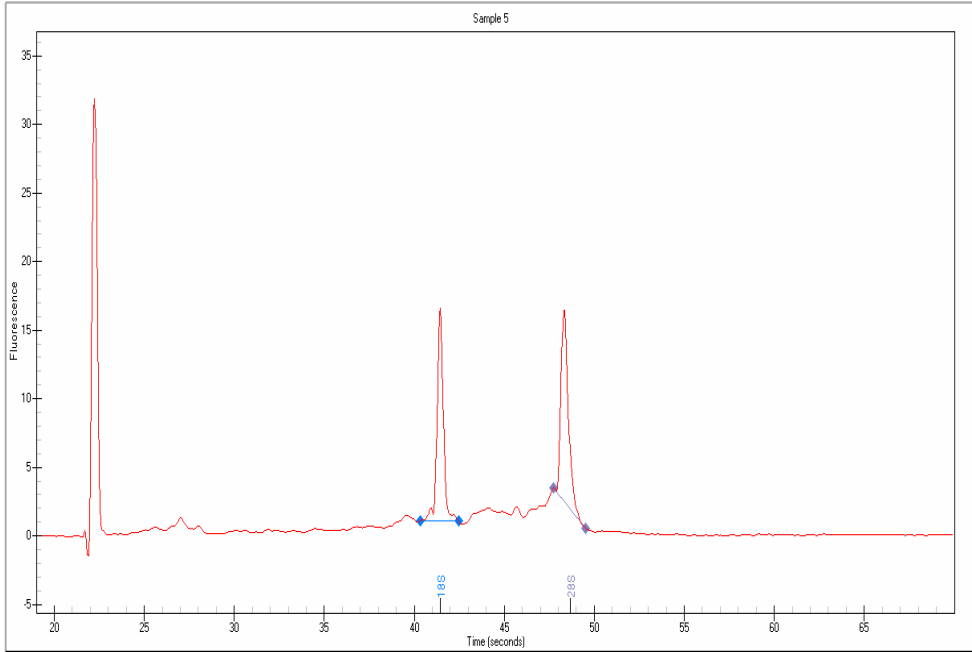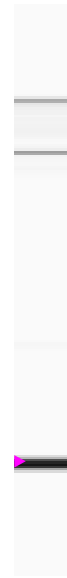

5

**Well# 5 Sample 5**

| Fragment Number | Fragment Name | Start Time | End Time | Area  | % of Total Area |
|-----------------|---------------|------------|----------|-------|-----------------|
| 1               | 18S           | 40.40      | 42.45    | 15.01 | 16.54           |
| 2               | 28S           | 47.75      | 49.55    | 13.75 | 15.16           |

RNA Area: 90.74

RNA Concentration: 59.83 ng/μl

Ratio[28S/18S]: 0.92

RQI: 8.4

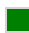

**Well# 5 Sample 5**

| Peak State | Peak Number | Mig. Time (secs) | Corrected Area | Comments |
|------------|-------------|------------------|----------------|----------|
|            | 1           | 22.25            | 47.37          |          |
|            | 2           | 27.05            | 1.72           |          |
|            | 3           | 40.92            | 0.54           |          |
|            | 4           | 41.46            | 13.64          |          |
|            | 5           | 45.68            | 0.35           |          |
|            | 6           | 47.78            | 2.45           |          |
|            | 7           | 48.32            | 18.04          |          |

Egram, Gel Lane and Result Table Report

**Project:** PGX160511Yulia  
**Assay:** Eukaryote Total RNA StdSens  
**Run:** Run\_Eukaryote\_TotalRNA\_StdSens\_001398\_5-16-2011\_9-12-22 AM  
**Run Version:** N/A

**Acq. Analyst:** DefaultUser  
**Acq. Time:** 5/16/2011 9:12:23 AM  
**Signature:** N/A

**Well# 6 Sample 6**

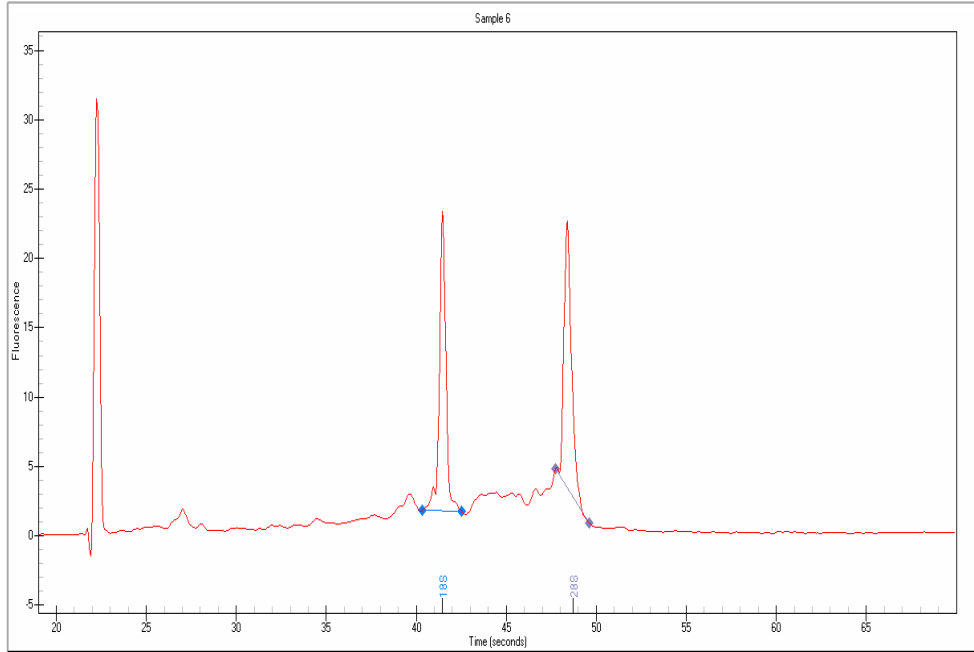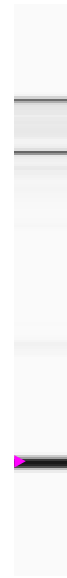

6

**Well# 6 Sample 6**

| Fragment Number | Fragment Name | Start Time | End Time | Area  | % of Total Area |
|-----------------|---------------|------------|----------|-------|-----------------|
| 1               | 18S           | 40.40      | 42.50    | 21.78 | 16.05           |
| 2               | 28S           | 47.80      | 49.60    | 18.82 | 13.87           |

RNA Area: 135.67

RNA Concentration: 89.45 ng/μl

Ratio[28S/18S]: 0.86

RQI: 7.8 ■

**Well# 6 Sample 6**

| Peak State | Peak Number | Mig. Time (secs) | Corrected Area | Comments |
|------------|-------------|------------------|----------------|----------|
|            | 1           | 22.25            | 46.14          |          |
|            | 2           | 27.05            | 2.44           |          |
|            | 3           | 39.65            | 1.89           |          |
|            | 4           | 40.92            | 0.84           |          |
|            | 5           | 41.46            | 19.12          |          |
|            | 6           | 46.66            | 0.71           |          |
|            | 7           | 47.78            | 2.52           |          |

# Egram, Gel Lane and Result Table Report

**Project:** PGX160511Yulia  
**Assay:** Eukaryote Total RNA StdSens  
**Run:** Run\_Eukaryote\_TotalRNA\_StdSens\_001398\_5-16-2011\_9-12-22 AM  
**Run Version:** N/A

**Acq. Analyst:** DefaultUser  
**Acq. Time:** 5/16/2011 9:12:23 AM  
**Signature:** N/A

## Well# 6 Sample 6

| Peak State | Peak Number | Mig. Time (secs) | Corrected Area | Comments |
|------------|-------------|------------------|----------------|----------|
|            | 8           | 48.37            | 24.17          |          |

Egram, Gel Lane and Result Table Report

**Project:** PGX160511Yulia  
**Assay:** Eukaryote Total RNA StdSens  
**Run:** Run\_Eukaryote\_TotalRNA\_StdSens\_001398\_5-16-2011\_9-12-22 AM  
**Run Version:** N/A

**Acq. Analyst:** DefaultUser  
**Acq. Time:** 5/16/2011 9:12:23 AM  
**Signature:** N/A

**Well# 7 Sample 7**

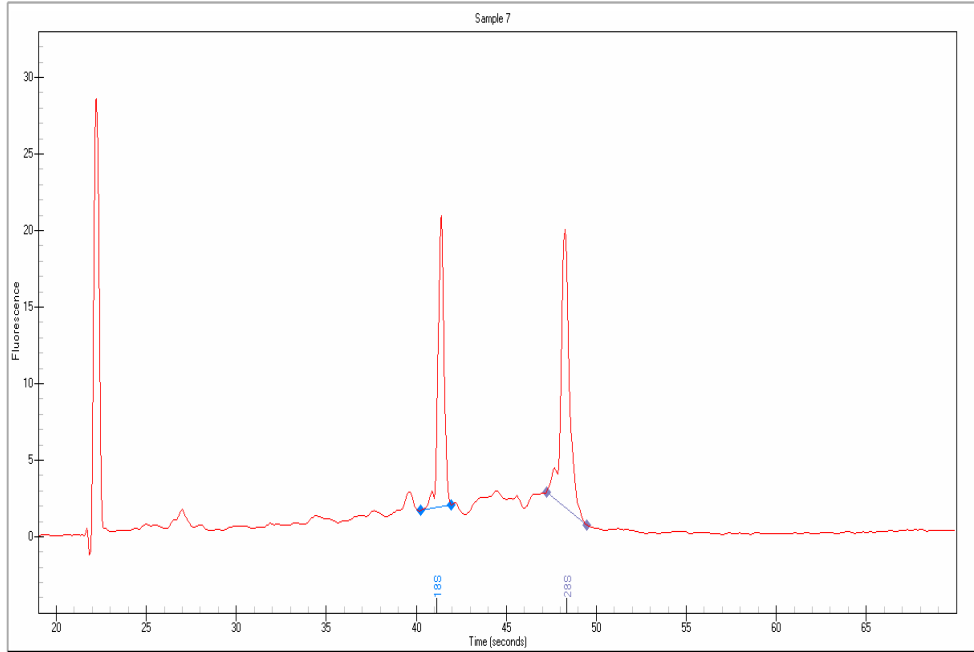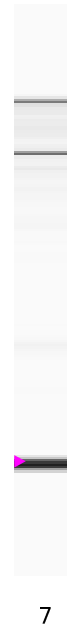

**Well# 7 Sample 7**

| Fragment Number | Fragment Name | Start Time | End Time | Area  | % of Total Area |
|-----------------|---------------|------------|----------|-------|-----------------|
| 1               | 18S           | 40.30      | 41.95    | 17.86 | 14.67           |
| 2               | 28S           | 47.25      | 49.45    | 20.48 | 16.82           |

RNA Area: 121.75  
 RNA Concentration: 80.27 ng/μl  
 Ratio[28S/18S]: 1.15  
 RQI: 8.4 ■

**Well# 7 Sample 7**

| Peak State | Peak Number | Mig. Time (secs) | Corrected Area | Comments |
|------------|-------------|------------------|----------------|----------|
|            | 1           | 22.25            | 41.77          |          |
|            | 2           | 27.00            | 1.83           |          |
|            | 3           | 39.60            | 1.65           |          |
|            | 4           | 40.87            | 0.71           |          |
|            | 5           | 41.36            | 16.96          |          |
|            | 6           | 47.69            | 1.70           |          |
|            | 7           | 48.27            | 19.42          |          |

Egram, Gel Lane and Result Table Report

**Project:** PGX160511Yulia  
**Assay:** Eukaryote Total RNA StdSens  
**Run:** Run\_Eukaryote\_TotalRNA\_StdSens\_001398\_5-16-2011\_9-12-22 AM  
**Run Version:** N/A

**Acq. Analyst:** DefaultUser  
**Acq. Time:** 5/16/2011 9:12:23 AM  
**Signature:** N/A

**Well# 8 Sample 8**

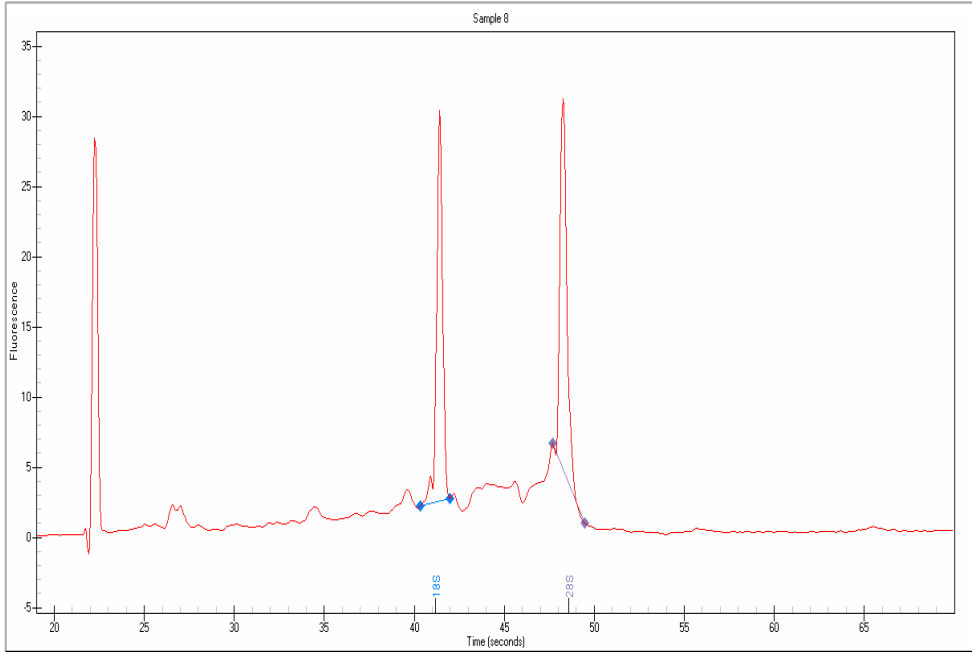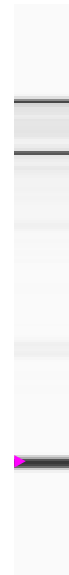

8

**Well# 8 Sample 8**

| Fragment Number | Fragment Name | Start Time | End Time | Area  | % of Total Area |
|-----------------|---------------|------------|----------|-------|-----------------|
| 1               | 18S           | 40.35      | 42.00    | 26.13 | 15.76           |
| 2               | 28S           | 47.70      | 49.45    | 23.94 | 14.43           |

RNA Area: 165.83  
 RNA Concentration: 109.34 ng/μl  
 Ratio[28S/18S]: 0.92

RQI: 7.7 ■

**Well# 8 Sample 8**

| Peak State | Peak Number | Mig. Time (secs) | Corrected Area | Comments |
|------------|-------------|------------------|----------------|----------|
|            | 1           | 22.25            | 40.88          |          |
|            | 2           | 26.58            | 2.06           |          |
|            | 3           | 27.02            | 1.98           |          |
|            | 4           | 34.46            | 1.82           |          |
|            | 5           | 39.63            | 1.71           |          |
|            | 6           | 40.91            | 1.04           |          |
|            | 7           | 41.40            | 24.32          |          |



# Egram, Gel Lane and Result Table Report

**Project:** PGX160511Yulia  
**Assay:** Eukaryote Total RNA StdSens  
**Run:** Run\_Eukaryote\_TotalRNA\_StdSens\_001398\_5-16-2011\_9-12-22 AM  
**Run Version:** N/A

**Acq. Analyst:** DefaultUser  
**Acq. Time:** 5/16/2011 9:12:23 AM  
**Signature:** N/A

| Well# 8 Sample 8 |             |                  |                |          |
|------------------|-------------|------------------|----------------|----------|
| Peak State       | Peak Number | Mig. Time (secs) | Corrected Area | Comments |
|                  | 8           | 47.70            | 2.64           |          |
|                  | 9           | 48.24            | 29.31          |          |

Egram, Gel Lane and Result Table Report

**Project:** PGX160511Yulia  
**Assay:** Eukaryote Total RNA StdSens  
**Run:** Run\_Eukaryote\_TotalRNA\_StdSens\_001398\_5-16-2011\_9-12-22 AM  
**Run Version:** N/A

**Acq. Analyst:** DefaultUser  
**Acq. Time:** 5/16/2011 9:12:23 AM  
**Signature:** N/A

**Well# 9 Sample 9**

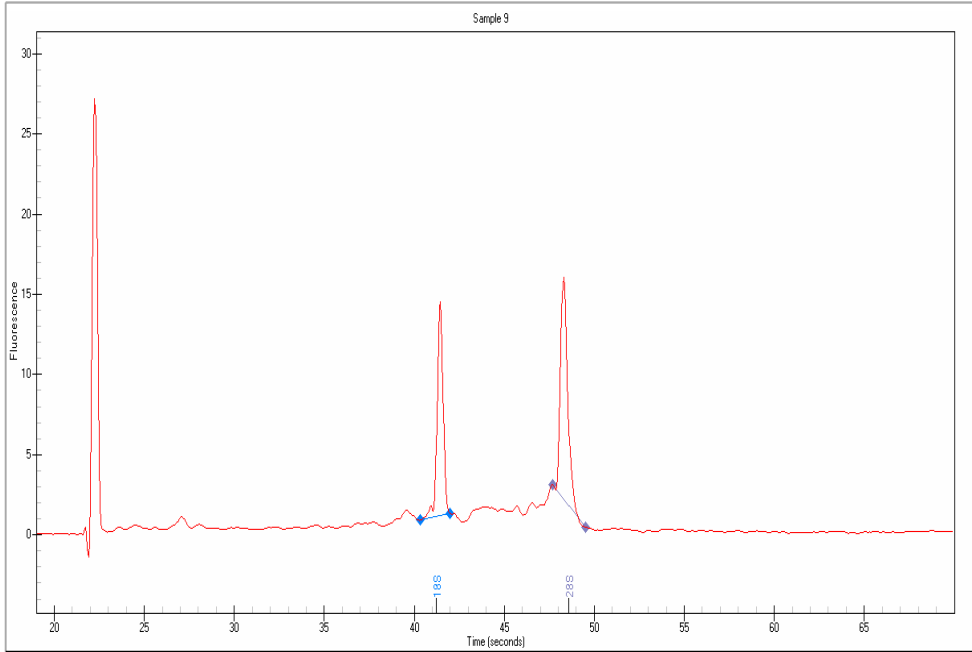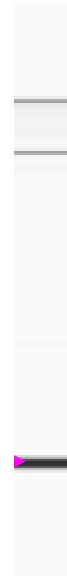

9

**Well# 9 Sample 9**

| Fragment Number | Fragment Name | Start Time | End Time | Area  | % of Total Area |
|-----------------|---------------|------------|----------|-------|-----------------|
| 1               | 18S           | 40.40      | 42.05    | 12.50 | 15.73           |
| 2               | 28S           | 47.70      | 49.50    | 13.31 | 16.74           |

RNA Area: 79.50

RNA Concentration: 52.42 ng/μl

Ratio[28S/18S]: 1.06

RQI: 8.8 ■

**Well# 9 Sample 9**

| Peak State | Peak Number | Mig. Time (secs) | Corrected Area | Comments |
|------------|-------------|------------------|----------------|----------|
|            | 1           | 22.25            | 38.96          |          |
|            | 2           | 27.05            | 1.02           |          |
|            | 3           | 39.61            | 1.06           |          |
|            | 4           | 40.89            | 0.44           |          |
|            | 5           | 41.43            | 11.85          |          |
|            | 6           | 46.53            | 1.29           |          |
|            | 7           | 47.71            | 2.29           |          |

# Egram, Gel Lane and Result Table Report

**Project:** PGX160511Yulia  
**Assay:** Eukaryote Total RNA StdSens  
**Run:** Run\_Eukaryote\_TotalRNA\_StdSens\_001398\_5-16-2011\_9-12-22 AM  
**Run Version:** N/A

**Acq. Analyst:** DefaultUser  
**Acq. Time:** 5/16/2011 9:12:23 AM  
**Signature:** N/A

| Well# 9 Sample 9 |             |                  |                |          |
|------------------|-------------|------------------|----------------|----------|
| Peak State       | Peak Number | Mig. Time (secs) | Corrected Area | Comments |
|                  | 8           | 48.31            | 16.80          |          |

Egram, Gel Lane and Result Table Report

**Project:** PGX160511Yulia  
**Assay:** Eukaryote Total RNA StdSens  
**Run:** Run\_Eukaryote\_TotalRNA\_StdSens\_001398\_5-16-2011\_9-12-22 AM  
**Run Version:** N/A

**Acq. Analyst:** DefaultUser  
**Acq. Time:** 5/16/2011 9:12:23 AM  
**Signature:** N/A

**Well# 10 Sample 10**

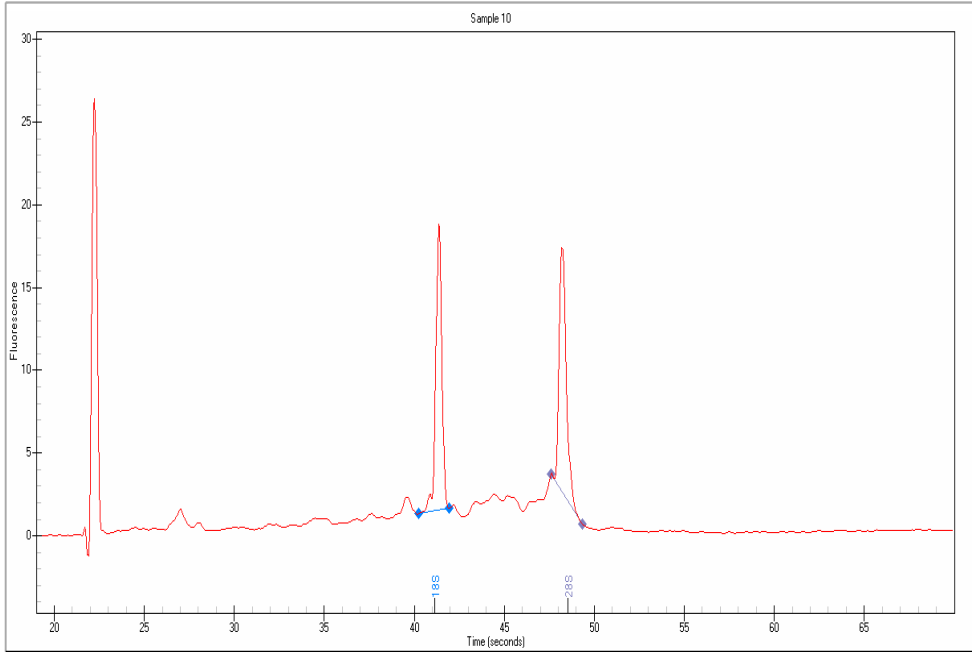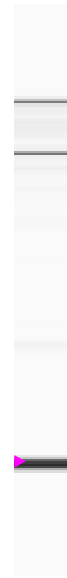

10

**Well# 10 Sample 10**

| Fragment Number | Fragment Name | Start Time | End Time | Area  | % of Total Area |
|-----------------|---------------|------------|----------|-------|-----------------|
| 1               | 18S           | 40.30      | 41.95    | 16.40 | 16.13           |
| 2               | 28S           | 47.65      | 49.40    | 13.81 | 13.58           |

RNA Area: 101.67

RNA Concentration: 67.03 ng/μl

Ratio[28S/18S]: 0.84

RQI: 7.5 ■

**Well# 10 Sample 10**

| Peak State | Peak Number | Mig. Time (secs) | Corrected Area | Comments |
|------------|-------------|------------------|----------------|----------|
|            | 1           | 22.25            | 38.36          |          |
|            | 2           | 27.00            | 3.03           |          |
|            | 3           | 39.61            | 1.40           |          |
|            | 4           | 40.84            | 0.63           |          |
|            | 5           | 41.39            | 15.63          |          |
|            | 6           | 47.66            | 1.51           |          |
|            | 7           | 48.21            | 16.88          |          |

Egram, Gel Lane and Result Table Report

**Project:** PGX160511Yulia  
**Assay:** Eukaryote Total RNA StdSens  
**Run:** Run\_Eukaryote\_TotalRNA\_StdSens\_001398\_5-16-2011\_9-12-22 AM  
**Run Version:** N/A

**Acq. Analyst:** DefaultUser  
**Acq. Time:** 5/16/2011 9:12:23 AM  
**Signature:** N/A

**Well# 11 Sample 11**

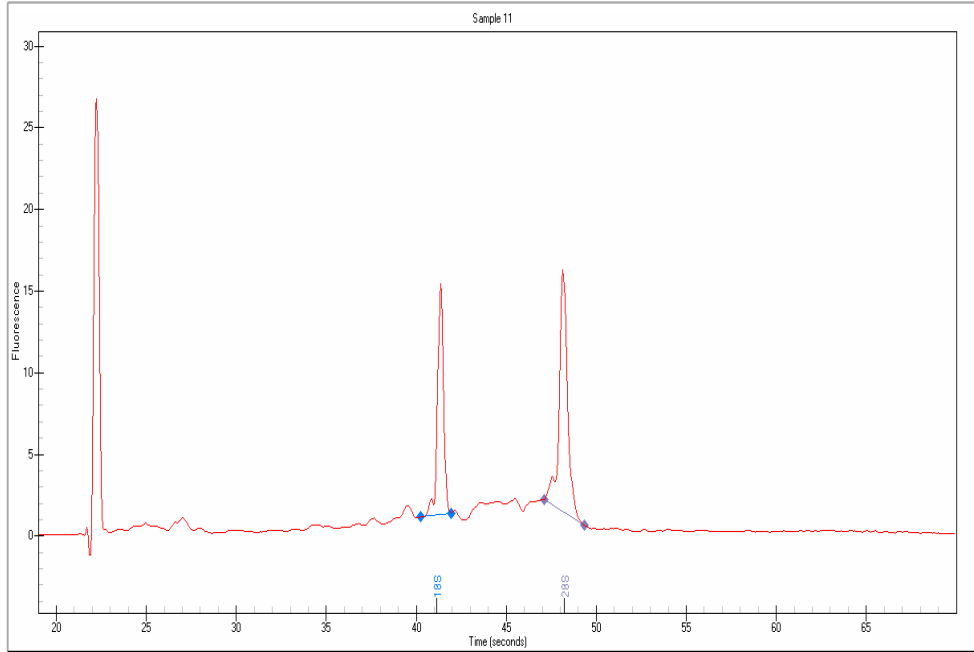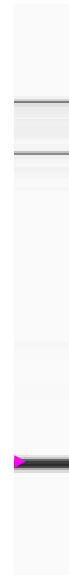

11

**Well# 11 Sample 11**

| Fragment Number | Fragment Name | Start Time | End Time | Area  | % of Total Area |
|-----------------|---------------|------------|----------|-------|-----------------|
| 1               | 18S           | 40.30      | 41.95    | 13.30 | 14.69           |
| 2               | 28S           | 47.10      | 49.35    | 16.79 | 18.55           |

RNA Area: 90.52

RNA Concentration: 59.68 ng/μl

Ratio[28S/18S]: 1.26

RQI: 9.0 ■

**Well# 11 Sample 11**

| Peak State | Peak Number | Mig. Time (secs) | Corrected Area | Comments |
|------------|-------------|------------------|----------------|----------|
|            | 1           | 22.25            | 38.76          |          |
|            | 2           | 27.02            | 1.12           |          |
|            | 3           | 39.53            | 1.06           |          |
|            | 4           | 40.82            | 0.66           |          |
|            | 5           | 41.37            | 12.49          |          |
|            | 6           | 47.58            | 1.40           |          |
|            | 7           | 48.18            | 15.76          |          |

Egram, Gel Lane and Result Table Report

**Project:** PGX160511Yulia  
**Assay:** Eukaryote Total RNA StdSens  
**Run:** Run\_Eukaryote\_TotalRNA\_StdSens\_001398\_5-16-2011\_9-12-22 AM  
**Run Version:** N/A

**Acq. Analyst:** DefaultUser  
**Acq. Time:** 5/16/2011 9:12:23 AM  
**Signature:** N/A

**Well# 12 Sample 12**

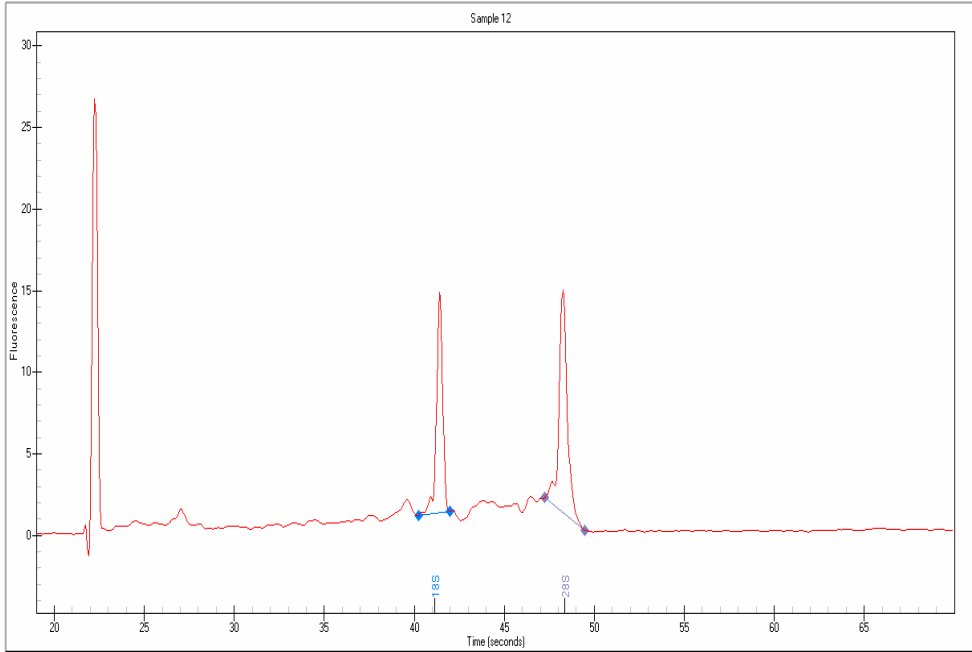

12

**Well# 12 Sample 12**

| Fragment Number | Fragment Name | Start Time | End Time | Area  | % of Total Area |
|-----------------|---------------|------------|----------|-------|-----------------|
| 1               | 18S           | 40.30      | 42.00    | 12.98 | 14.35           |
| 2               | 28S           | 47.25      | 49.45    | 15.28 | 16.89           |

RNA Area: 90.44

RNA Concentration: 59.63 ng/μl

Ratio[28S/18S]: 1.18

RQI: 8.4 ■

**Well# 12 Sample 12**

| Peak State | Peak Number | Mig. Time (secs) | Corrected Area | Comments |
|------------|-------------|------------------|----------------|----------|
|            | 1           | 22.25            | 38.22          |          |
|            | 2           | 27.08            | 1.58           |          |
|            | 3           | 39.62            | 1.34           |          |
|            | 4           | 40.92            | 0.51           |          |
|            | 5           | 41.41            | 11.91          |          |
|            | 6           | 46.49            | 1.05           |          |
|            | 7           | 47.69            | 2.22           |          |

# Egram, Gel Lane and Result Table Report

**Project:** PGX160511Yulia  
**Assay:** Eukaryote Total RNA StdSens  
**Run:** Run\_Eukaryote\_TotalRNA\_StdSens\_001398\_5-16-2011\_9-12-22 AM  
**Run Version:** N/A

**Acq. Analyst:** DefaultUser  
**Acq. Time:** 5/16/2011 9:12:23 AM  
**Signature:** N/A

## Well# 12 Sample 12

| Peak State | Peak Number | Mig. Time (secs) | Corrected Area | Comments |
|------------|-------------|------------------|----------------|----------|
|            | 8           | 48.23            | 15.88          |          |
